# Supplementary material for: Altered Indoleamine 2,3-Dioxygenase Production and Its Association to Inflammatory Cytokines in Peripheral Blood Mononuclear Cells Culture of Type 2 Diabetes Mellitus
Source: PubMed Central journal article supplement — Int J Tryptophan Res. 2020 Dec 9;13:1178646920978236. doi: 10.1177/1178646920978236 (PMC7731706; doi:10.1177/1178646920978236), 2020-12-09
Supplement: sj-pdf-1-try-10.1177_1178646920978236.pdf [file sj-pdf-1-try-10.1177_1178646920978236.pdf]

Supplemental table 1. Multivariant analysis of T2DM, BMI, and age on IDO level in PHA- stimulated and unstimulated cell culture supernatant

| Variable | Unstimulated culture supernatant |          |                  |        |        | PHA stimulated cell culture supernatant |          |                  |        |        |
|----------|----------------------------------|----------|------------------|--------|--------|-----------------------------------------|----------|------------------|--------|--------|
|          | Coefficient                      | <i>p</i> | Prevalence ratio | 95% CI |        | Coefficient                             | <i>p</i> | Prevalence ratio | 95% CI |        |
| T2DM     | 2.265                            | 0.041*   | 9.634            | 1.092  | 85.022 | 2.328                                   | 0.033*   | 10.255           | 1.207  | 87.153 |
| BMI      | 0.002                            | 0.987    | 1.002            | 0.779  | 1.290  | -0.174                                  | 0.431    | 0.950            | 0.837  | 1.079  |
| Age      | 0.088                            | 0.245    | 1.092            | 0.941  | 1.267  | -0.051                                  | 0.149    | 0.840            | 0.663  | 1.064  |

T2DM, type 2 diabetes mellitus; BMI, body mass index; IDO, indoleamine 2,3 dioxygenase; PHA, phytohemagglutinin; CI, confident interval \**p* < 0.05. Statistical significance was calculated using logistic regression.
